# Supplementary material for: Interfacial synthesis of micro-cuboid Ni0.55Co0.45C2O4 solid solution with enhanced electrochemical performance for hybrid supercapacitors
Source: Royal Society of Chemistry journal article supplement (doi:10.1039/c9nr03790j), 2019-01-01
Supplement: c9nr03790j1.pdf [file c9nr03790j1.pdf]

Electronic Supplementary Information (ESI)

**Interfacial synthesis of micro-cuboid  $\text{Ni}_{0.55}\text{Co}_{0.45}\text{C}_2\text{O}_4$  solid solution with enhanced electrochemical performance for hybrid supercapacitors**

Lin Wang,\* Runa Zhang, Yang Jiang, Hua Tian,\* Yu Tan, Kaixin Zhu, Zhifeng Yu and Wang Li

Hebei Key Laboratory of Applied Chemistry, College of Environmental and Chemical Engineering, Yanshan University, Qinhuangdao, 066004, China

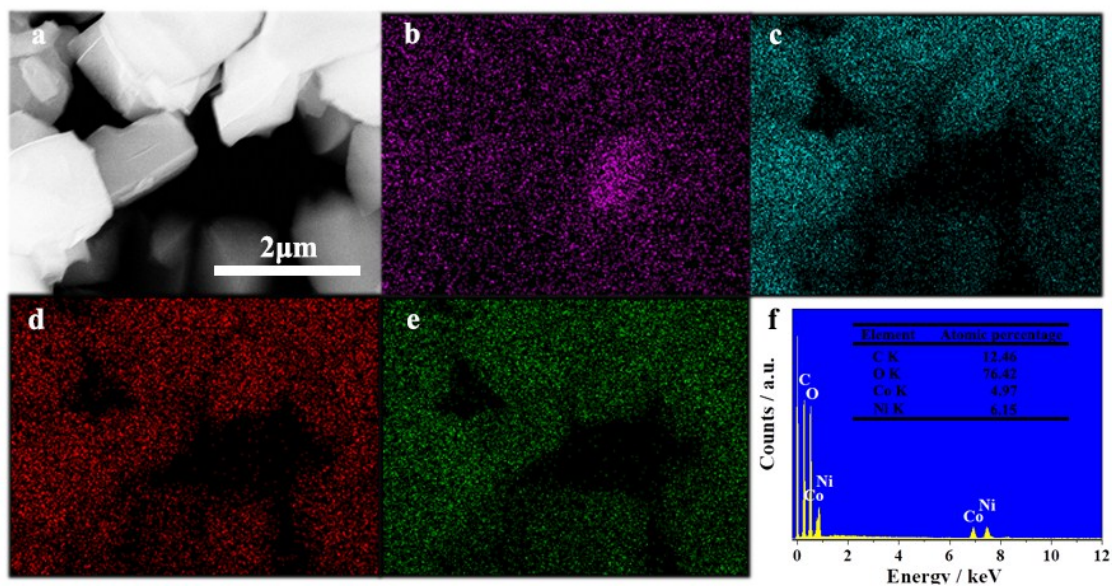

Fig. S1 EDS analysis of  $\text{Ni}_{0.55}\text{Co}_{0.45}\text{C}_2\text{O}_4$ : a) SEM image. b-e) Elemental EDS mapping of C, O, Co and Ni. f) The corresponding EDS spectrum.

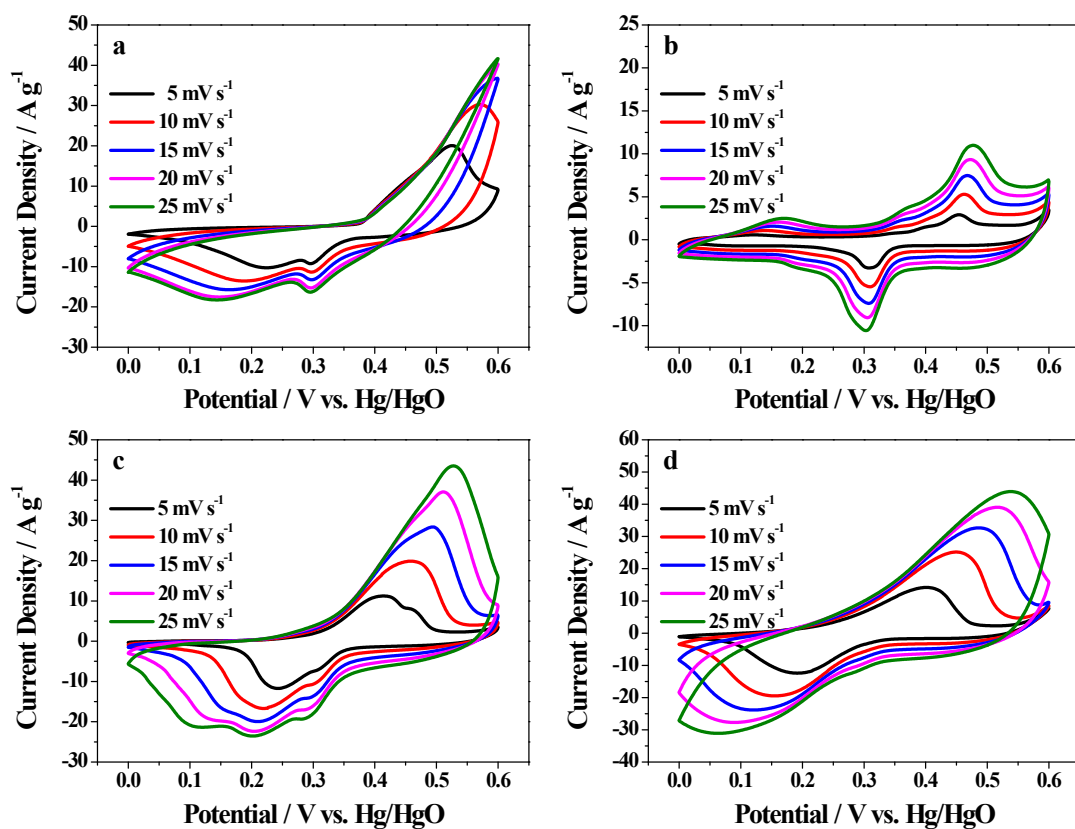

Fig. S2 CV curves of all the samples at various scan rates: a)  $\text{NiC}_2\text{O}_4$ . b)  $\text{CoC}_2\text{O}_4$ . c)  $\text{NiC}_2\text{O}_4/\text{CoC}_2\text{O}_4$  hybrids. d)  $\text{Ni}_{0.55}\text{Co}_{0.45}\text{C}_2\text{O}_4$ .

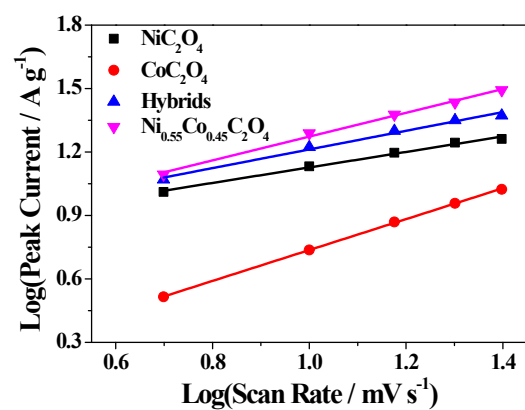

Fig. S3 The relationship curve of peak currents against scan rates in the double logarithm coordinate.

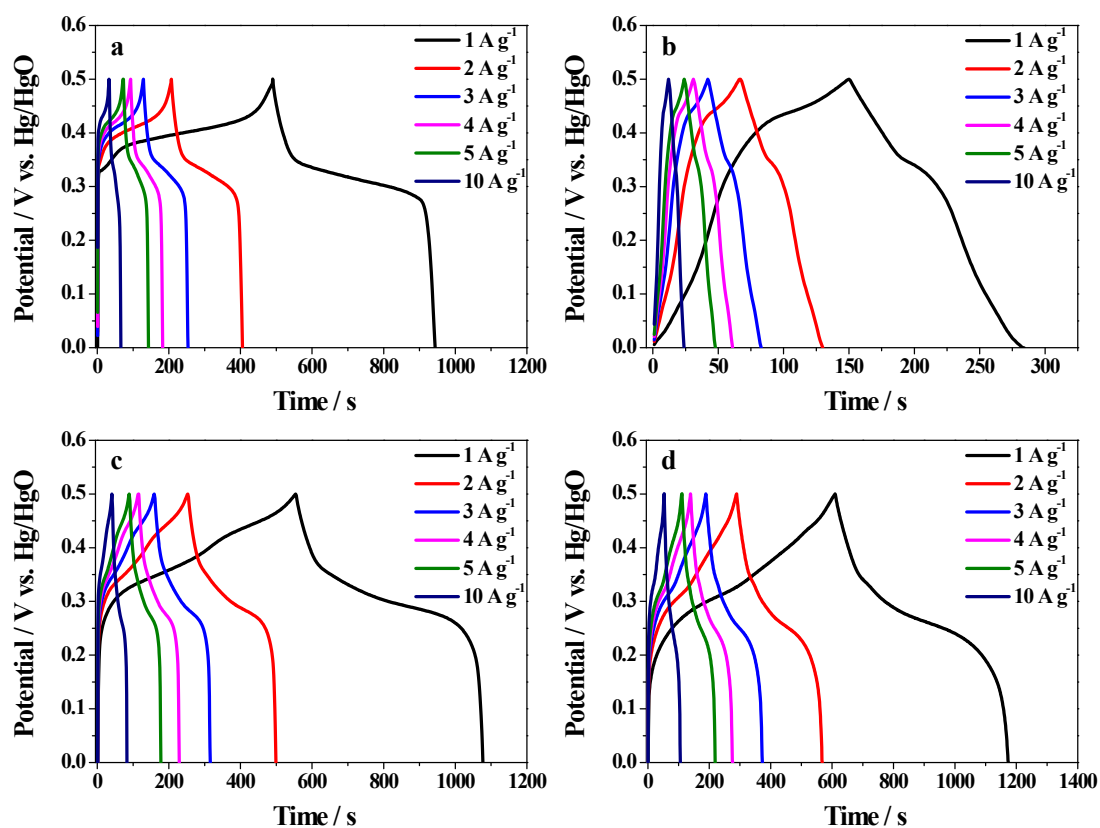

Fig. S4 GCD curves of all the samples at different current densities: a)  $\text{NiC}_2\text{O}_4$ . b)  $\text{CoC}_2\text{O}_4$ . c)  $\text{NiC}_2\text{O}_4/\text{CoC}_2\text{O}_4$  hybrids. d)  $\text{Ni}_{0.55}\text{Co}_{0.45}\text{C}_2\text{O}_4$ .

Table S1 Elemental composition of  $\text{Ni}_{0.55}\text{Co}_{0.45}\text{C}_2\text{O}_4$  based on ICP analysis.

| Sample                                                 | Percentage composition of Ni | Percentage composition of Co |
|--------------------------------------------------------|------------------------------|------------------------------|
| $\text{Ni}_{0.55}\text{Co}_{0.45}\text{C}_2\text{O}_4$ | 54.17%                       | 45.82%                       |
